# Supplementary material for: Functionalization of MOFs via a mixed-ligand strategy: enhanced CO2 uptake by pore surface modification
Source: Royal Society of Chemistry journal article supplement (doi:10.1039/c8dt00502h), 2018-01-01
Supplement: c8dt00502h1.pdf [file c8dt00502h1.pdf]

Electronic Supplementary Material (ESI) for

## Functionalization of MOFs via mixed-ligand strategy: enhanced CO<sub>2</sub> uptake by pore surface modification

Bo Liu,<sup>a</sup> Hui-Fang Zhou,<sup>b</sup> Lei Hou,<sup>\*b</sup> and Yao-Yu Wang<sup>b</sup>

<sup>a</sup>College of Chemistry & Pharmacy, Northwest A&F University, Yangling 712100, P. R. China.

<sup>b</sup>Key Laboratory of Synthetic and Natural Functional Molecule Chemistry of the Ministry of Education, Shaanxi Key Laboratory of Physico-Inorganic Chemistry, College of Chemistry & Materials Science, Northwest University, Xi'an 710069, P. R. China.

E-mail: lhou2009@nwu.edu.cn

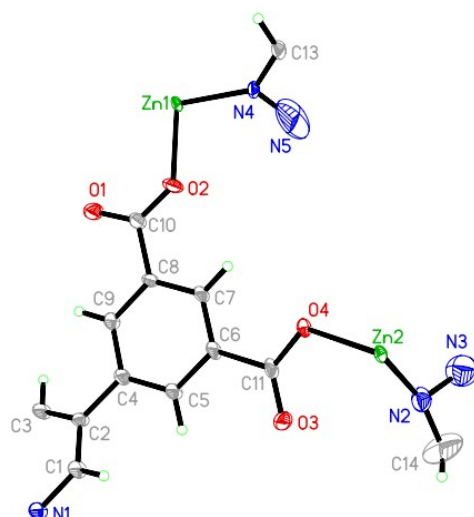

**Figure S1.** The asymmetric unit of **1** with the thermal ellipsoids shown at the 30% probability level.

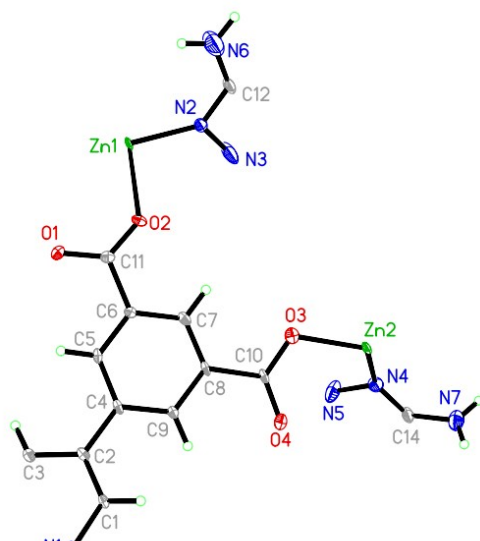

**Figure S2.** The asymmetric unit of 1-NH<sub>2</sub> with the thermal ellipsoids shown at the 30% probability level.

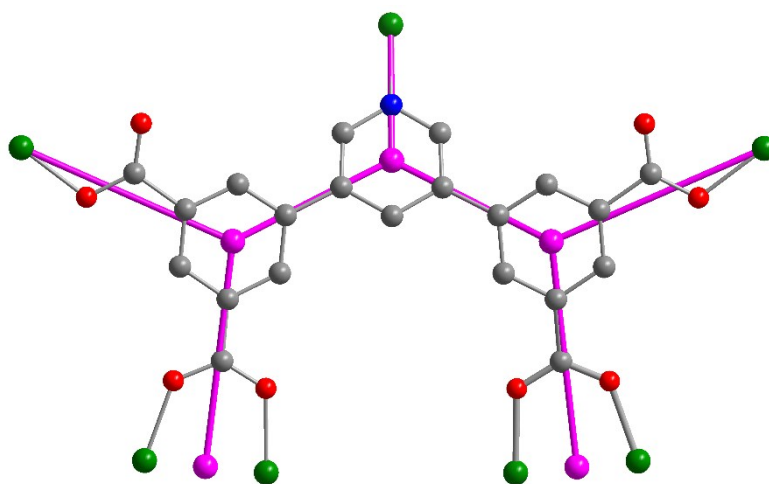

**Figure S3.** The BDPP<sup>4+</sup> ligand viewed as two kinds of 3-c nodes.

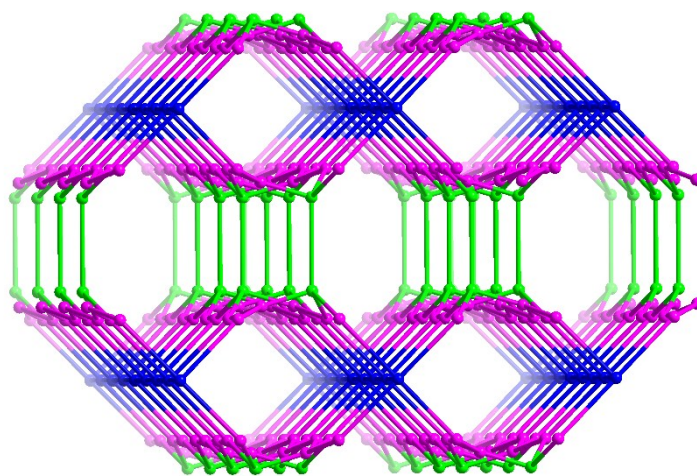

**Figure S4.** The (3,3,4,6)-connected topological representation for 1.

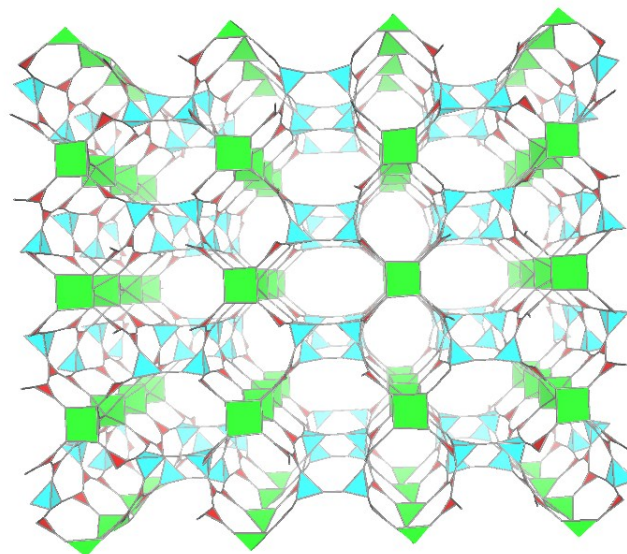

**Figure S5.** Polyhedral view of the (3,3,4,6)-connected topological network for **1**.

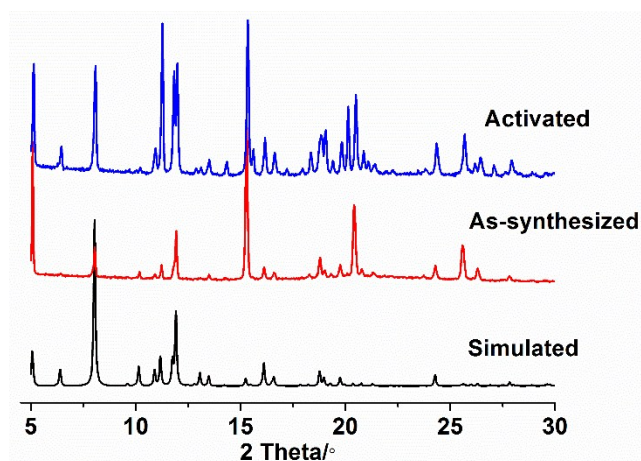

(a)

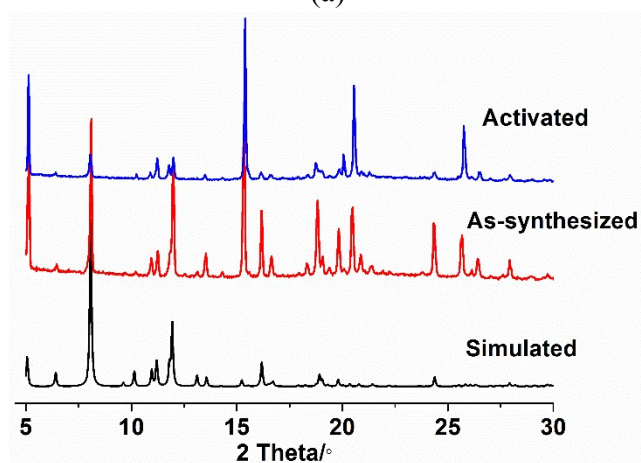

(b)

**Figure S6.** PXRD patterns of **1** (a) and **1-NH<sub>2</sub>** (b) from simulated by single-crystal structure, as-synthesized, and activated samples.

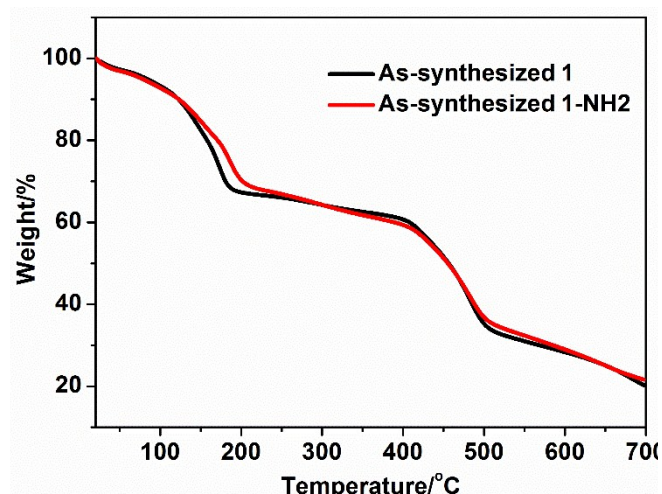

**Figure S7.** TGA plots of the as-synthesized **1** (black) and as-synthesized **1-NH<sub>2</sub>** (red).

#### **IAST adsorption selectivity calculation:**

The experimental isotherm data for pure CO<sub>2</sub> and CH<sub>4</sub> (measured at 298) were fitted using a Langmuir-Freundlich (L-F) model:

$$q = \frac{a * b * P^c}{1 + b * P^c}$$

Where  $q$  and  $p$  are adsorbed amounts and pressures of component  $i$ , respectively.

The adsorption selectivities for binary mixtures of CO<sub>2</sub>/CH<sub>4</sub>, defined by

$$S_{i/j} = \frac{x_i * y_j}{x_j * y_i}$$

was calculated using the Ideal Adsorption Solution Theory (IAST) of Myers and Prausnitz.

Where  $x_i$  is the mole fraction of component  $i$  in the adsorbed phase and  $y_i$  is the mole fraction of component  $i$  in the bulk.

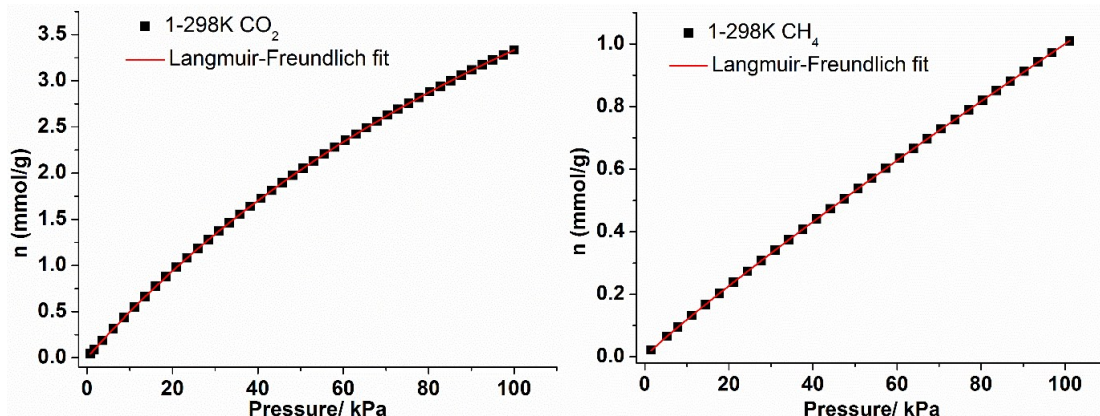

**Figure S8.** CO<sub>2</sub> adsorption isotherms of **1** with fitting by L-F model:  $a = 9.42961$ ,  $b = 0.00566$ ,  $c = 0.99263$ ,  $\text{Chi}^2 = 1.5948 \times 10^{-6}$ ,  $R^2 = 1$ ; CH<sub>4</sub> adsorption isotherms of **1** with fitting by L-F model:  $a = 26.71959$ ,  $b = 5.12354 \times 10^{-4}$ ,  $c = 0.94016$ ,  $\text{Chi}^2 = 3.93394 \times 10^{-7}$ ,  $R^2 = 1$ .

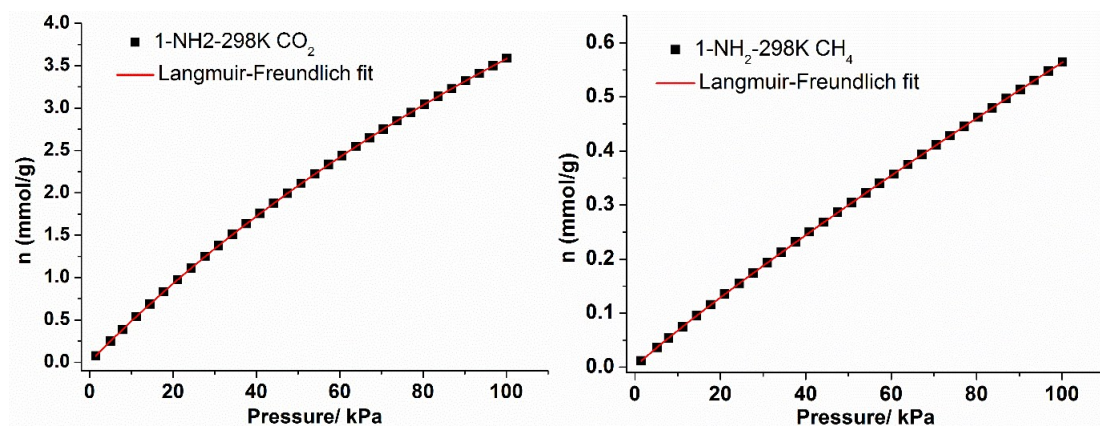

**Figure S9.** CO<sub>2</sub> adsorption isotherms of **1-NH<sub>2</sub>** with fitting by L-F model:  $a = 13.2721$ ,  $b = 0.00388$ ,  $c = 0.98949$ ,  $\text{Chi}^2 = 2.61712 \times 10^{-6}$ ,  $R^2 = 1$ ; CH<sub>4</sub> adsorption isotherms of **1-NH<sub>2</sub>** with fitting by L-F model:  $a = 15.27186$ ,  $b = 5.16741 \times 10^{-4}$ ,  $c = 0.93495$ ,  $\text{Chi}^2 = 2.24948 \times 10^{-7}$ ,  $R^2 = 0.99999$ .

## Calculation of sorption heat for CO<sub>2</sub> uptake using Virial 2 model

$$\ln P = \ln N + 1/T \sum_{i=0}^m aiN^i + \sum_{i=0}^n biN^i \quad Q_{st} = -R \sum_{i=0}^m aiN^i$$

The above equation was applied to fit the combined CO<sub>2</sub> isotherm data for desolvated **1** and **1-NH<sub>2</sub>** at 273 and 298 K, where  $P$  is the pressure,  $N$  is the adsorbed amount,  $T$  is the temperature,  $ai$  and  $bi$  are virial coefficients, and  $m$  and  $n$  are the number of coefficients used to describe the isotherms.  $Q_{st}$  is the coverage-dependent enthalpy of adsorption and  $R$  is the universal gas constant.

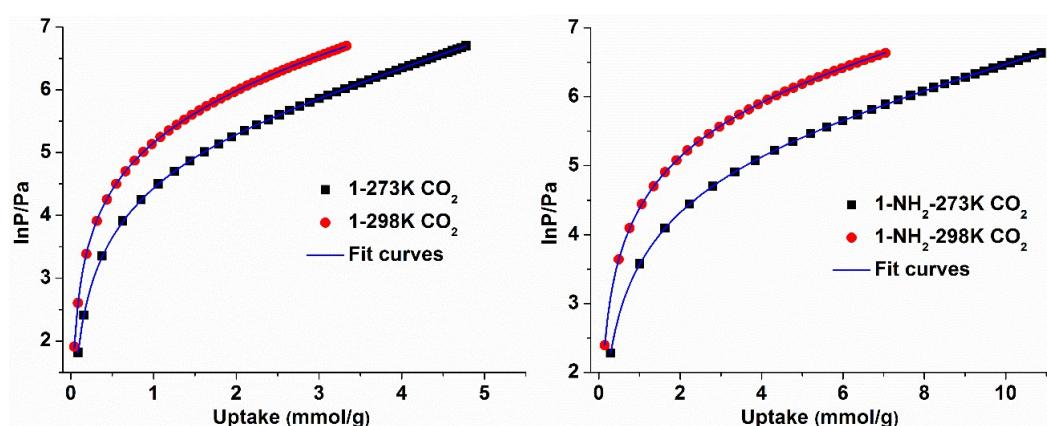

**Figure S10.** CO<sub>2</sub> adsorption isotherms for **1** and **1-NH<sub>2</sub>** with fitting by Virial 2 model.

Fitting results for **1**:  $a_0 = -2690.92245$ ,  $a_1 = 532.47729$ ,  $a_2 = -232.3643$ ,  $a_3 = 36.63609$ ,  $a_4 = -0.3078$ ,  $b_0 = 14.07969$ ,  $b_1 = -1.69208$ ,  $b_2 = 0.78722$ ,  $b_3 = -0.11842$ ,  $\text{Chi}^2 = 2.82305 \times 10^{-5}$ ,  $R^2 = 0.99998$ . Fitting results for **1-NH<sub>2</sub>**:  $a_0 = -2662.97499$ ,  $a_1 = 12.8101$ ,  $a_2 = 2.65671$ ,  $a_3 = 0.0521$ ,  $a_4 = -0.00904$ ,  $b_0 = 13.25475$ ,  $b_1 = 0.02509$ ,  $b_2 = -0.01589$ ,  $b_3 = 7.04865 \times 10^{-5}$ ,  $\text{Chi}^2 = 8.54265 \times 10^{-6}$ ,  $R^2 = 0.99999$ .
